# Supplementary material for: Muscle Arnt/Hif1β Is Dispensable in Myofiber Type Determination, Vascularization and Insulin Sensitivity
Source: PubMed Central journal article supplement (PMC5178999; doi:10.1371/journal.pone.0168457), 2016-12-22
Supplement: pone.0168457.s011.pdf [file pone.0168457.s011.pdf]

55 **SUPPLEMENTAL TABLES**56 **S1 Table.** Tissue weights in 4 month-old male control and MKO mice.

|                   | Control     | MKO         | p value |
|-------------------|-------------|-------------|---------|
| Quadriceps        | 215.7±9.4   | 204.8±3.5   | NS      |
| Tibialis Anterior | 51.5±1.2    | 47.3±1.4    | NS      |
| Gastrocnemius     | 135±6.4     | 122.4±4.5   | NS      |
| Perigonadic WAT   | 136.8±16.59 | 147.8±10.94 | NS      |
| BAT               | 64.63±5.8   | 68.20±3.7   | NS      |

57
