# Supplementary material for: Muscle Arnt/Hif1β Is Dispensable in Myofiber Type Determination, Vascularization and Insulin Sensitivity
Source: PubMed Central journal article supplement (PMC5178999; doi:10.1371/journal.pone.0168457), 2016-12-22
Supplement: pone.0168457.s012.pdf [file pone.0168457.s012.pdf]

|                 | Forward                          | Reverse                        |
|-----------------|----------------------------------|--------------------------------|
| <i>Acadm</i>    | 5'-AGGGTTTAGTTTTGAGTTGACGG-3'    | 5'-CCCCGCTTTTGTTCATATTCCG-3'   |
| <i>Arnt</i>     | 5'-CATCATCGGTCTAGTTCCAGTG-3'     | 5'-CAGCATGGACAGCATTCTTG-3'     |
| <i>Cd36</i>     | 5'-CTGGGACCATTGGTGATGAAA-3'      | 5'-CACCACTCCAATCCCAAGTAAG-3'   |
| <i>Cpt1b</i>    | 5'-GGGCACCTCTGGGAGTTTGT-3'       | 5'-TGGCTCACCCACACAGTGT-3''-    |
| <i>Ckmt2</i>    | 5'-ACACCCAGTGGCTATACCCTG-3'      | 5'-CCGTAGGATGCTTCATCACCC-3'    |
| <i>Essra</i>    | 5'-CTCAGCTCTCTACCCAAACGC-3'      | 5'-CCGCTTGGTGATCTCACACTC-3'    |
| <i>Essrg</i>    | 5'-GTTTTAAAGGCCCTTGGTGATCTCGC-3' | 5'-CTGCAACCCTTGGACTGCCAGAAC-3' |
| <i>Hprt</i>     | 5'-GCTCGAGATGTCATGAAGGAGAT-3'    | 5'-AAAGAACTTATAGCCCCCTTGA-3'   |
| <i>Ldha</i>     | 5'-TGTCTCCAGCAAAGACTACTGT-3'     | 5'-GACTGTACTTGACAATGTTGGGA-3'  |
| <i>Mb</i>       | 5'-CTGTTTAAGACTCACCCCTGAGAC-3'   | 5'-GGTGCAACCATGCTTCTTCA-3'     |
| <i>Myh1</i>     | 5'-CTCCAGGCTGCTTTAGAGGAA-3'      | 5'-CCTGCTCCTAATCTCAGCATCC-3'   |
| <i>Myh2</i>     | 5'-AAATCTTACAAGAGACAAGCTGAGG-3'  | 5'-TGCGGAACTTGGATAGATTTG-3'    |
| <i>Myh4</i>     | 5'-GAAGAGCCGAGAGGTTACACAC-3'     | 5'-CAGGACAGTGACAAAGAACGTC-3'   |
| <i>Myh7</i>     | 5'-ACTGTCAACACTAAGAGGGTCA-3'     | 5'-TTGGATGATTTGATCTTCCAGGG-3'  |
| <i>Pdhk4</i>    | 5'-AAGCAAACACAAACACGAGTA-3'      | 5'-CCCGGGTCATCCAACCA-3'        |
| <i>Ppara</i>    | 5'-ACAAGGCCTCAGGGTACCA-3'        | 5'-GCCGAAAGAAGCCCTTACAG-3'     |
| <i>Ppard</i>    | 5'-GCCTCGGGCTTCCACTAC-3'         | 5'-AGATCCGATCGCACTTCTCA-3'     |
| <i>Ppargc1a</i> | 5'-AACCACACCCACAGGATCAGA-3'      | 5'-TCTTCGCTTTATTGCTCCATGA-3'   |
| <i>Ppargc1b</i> | 5'-TCCTGTAAAAGCCCGGAGTAT-3'      | 5'-GCTCTGGTAGGGGCAGTGA-3'      |
| <i>Ppia</i>     | 5'-TGGAGAGCACCAAGACAGACA-3'      | 5'-TGCCGGAGTCGACAATGAT-3'      |
| <i>Slc2a1</i>   | 5'-CAGTTCGGCTATAAACTGGTG-3'      | 5'-GCCCCCGACAGACAGAGAAGATG-3'  |
| <i>Slc2a4</i>   | 5'-GTGACTGGAACACTGGTCCTA-3'      | 5'-CCAGCCACGTTGCATTGTAG-3'     |
| <i>Tnni1</i>    | 5'-ATGCCGGAAGTTGAGAGGAAA-3'      | 5'-TCCGAGAGGTAACGCACCTT-3'     |
| <i>Vegfa</i>    | 5'-CGAGATAGAGTACATCTTCAAGCC-3'   | 5'-TCATCGTTACAGCAGCCTGC-3'     |
| <i>Vegfa121</i> | 5'-TGCAGGCTGCTGTAACGATG-3'       | 5'-CCTCGGCTTGTACATTTTTTCT-3'   |
| <i>Vegfa165</i> | 5'-TGCAGGCTGCTGTAACGATG-3'       | 5'-GAACAAGGCTCACAGTGATTTTCT-3' |
| <i>Vegfa189</i> | 5'-TGCAGGCTGCTGTAACGATG-3'       | 5'-TCCAGGATTTAAACCGGGATT-3'    |
